# Supplementary material for: Characteristics of Pathogenic Escherichia coli Associated with Diarrhea in Children under Five Years in Northwestern Ethiopia
Source: MDPI journal article supplement (doi:10.3390/tropicalmed9030065), 2024-03-21
Supplement: s1 [file s1]

|   |   |   |   |   |   |   |   |   |   |    |   |
|---|---|---|---|---|---|---|---|---|---|----|---|
| M | + | 2 | 3 | 4 | 5 | 6 | 7 | 8 | 9 | 10 | - |
|---|---|---|---|---|---|---|---|---|---|----|---|

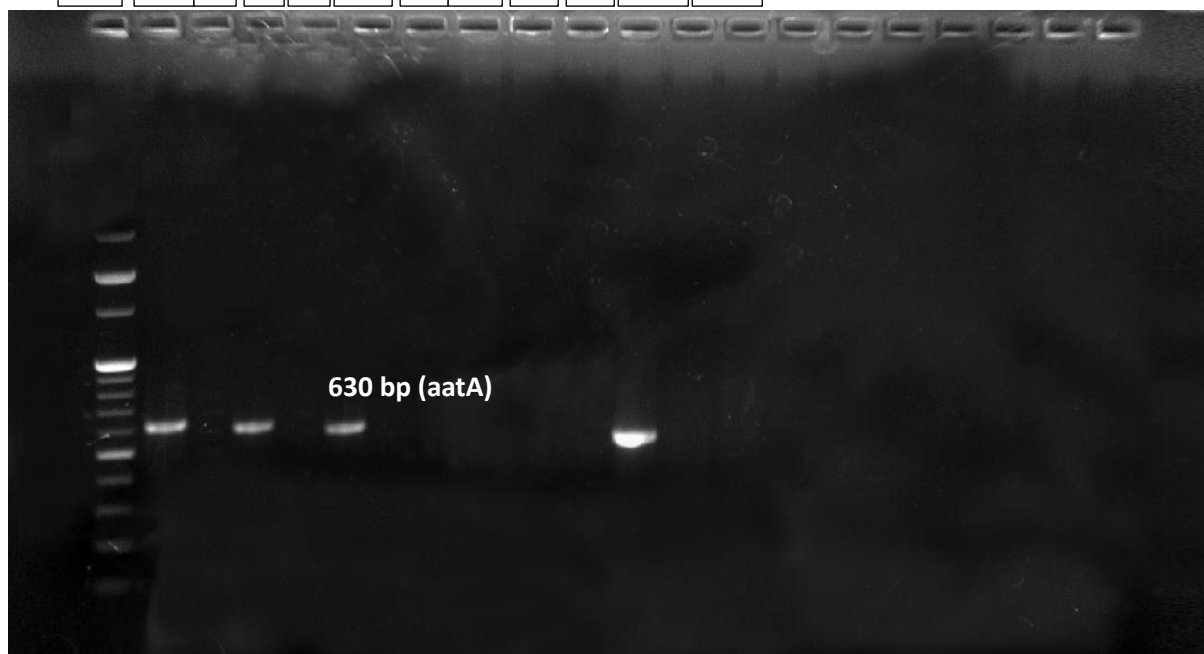

|   |   |   |   |   |   |   |
|---|---|---|---|---|---|---|
| M | + | 2 | 3 | 4 | 5 | - |
|---|---|---|---|---|---|---|

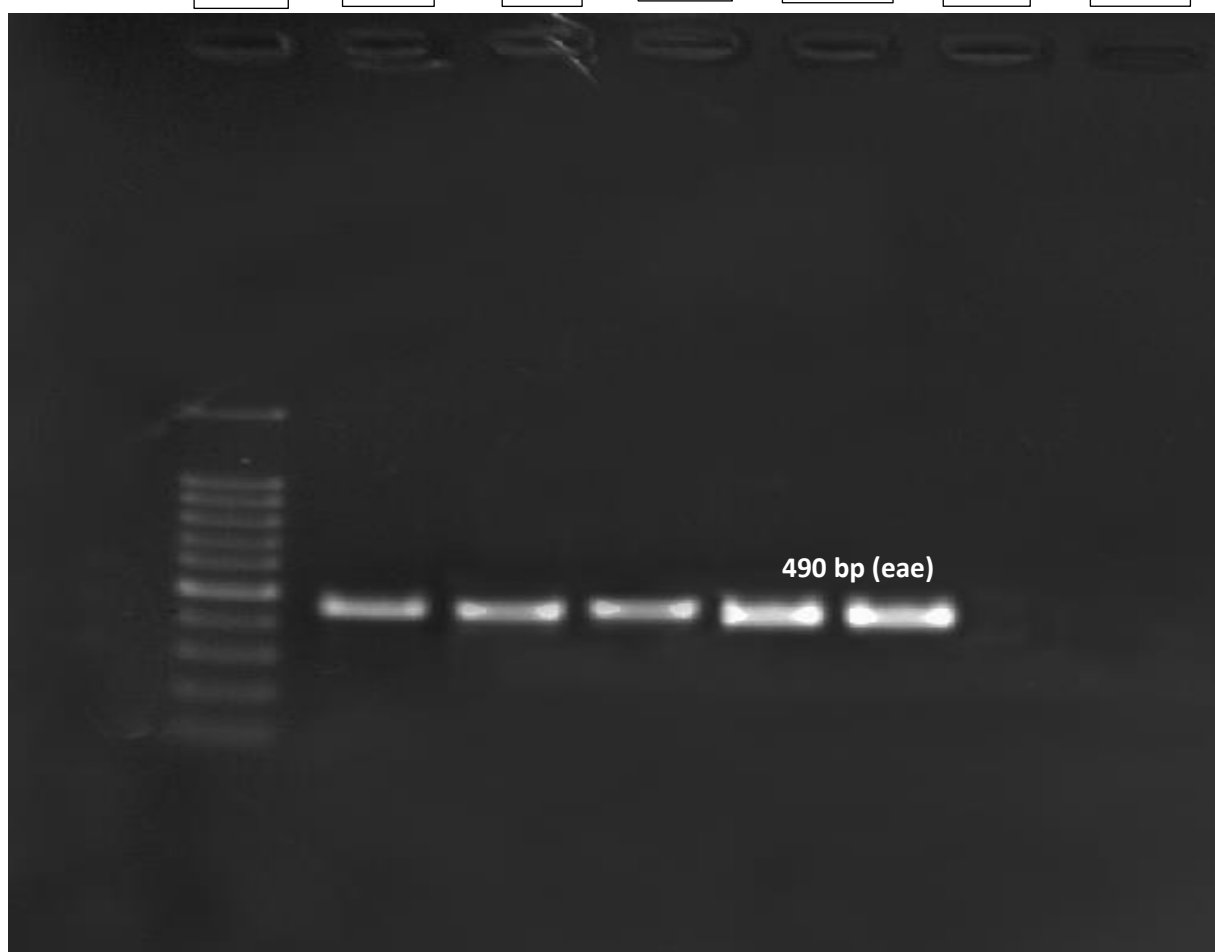

|   |   |   |   |   |   |   |   |
|---|---|---|---|---|---|---|---|
| M | + | 2 | 3 | 4 | 5 | 6 | - |
|---|---|---|---|---|---|---|---|

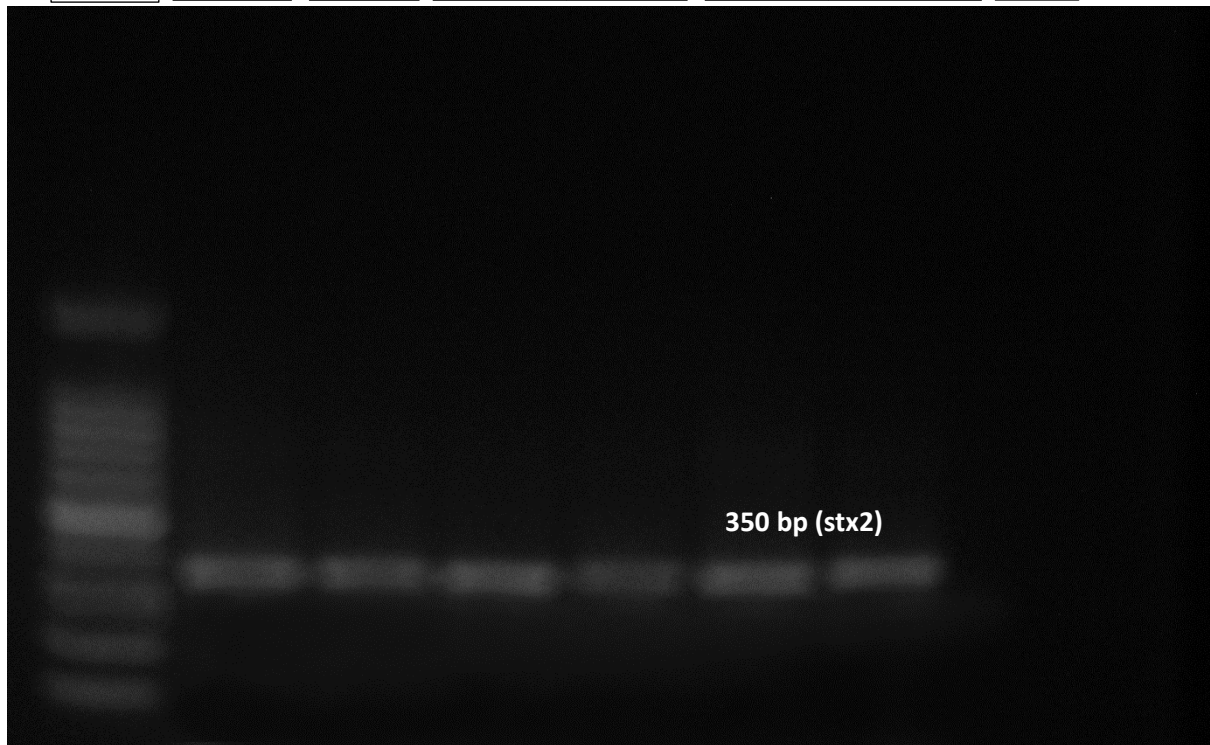

|   |   |   |   |   |   |   |   |   |   |
|---|---|---|---|---|---|---|---|---|---|
| M | + | 2 | 3 | 4 | 5 | 6 | 7 | 8 | - |
|---|---|---|---|---|---|---|---|---|---|

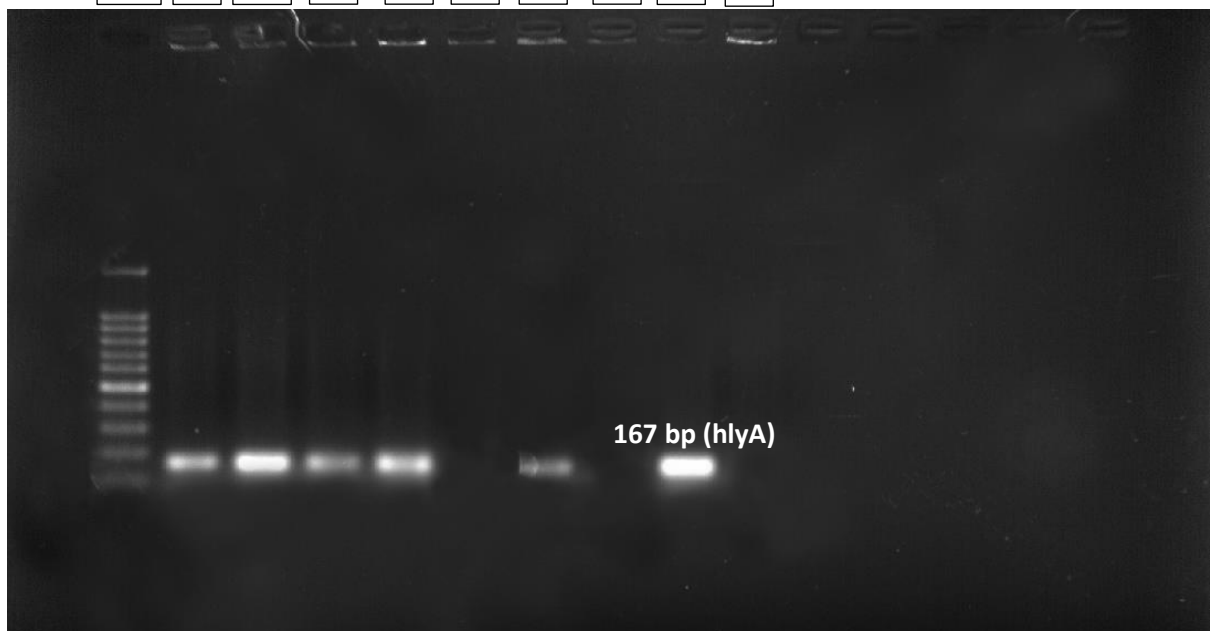

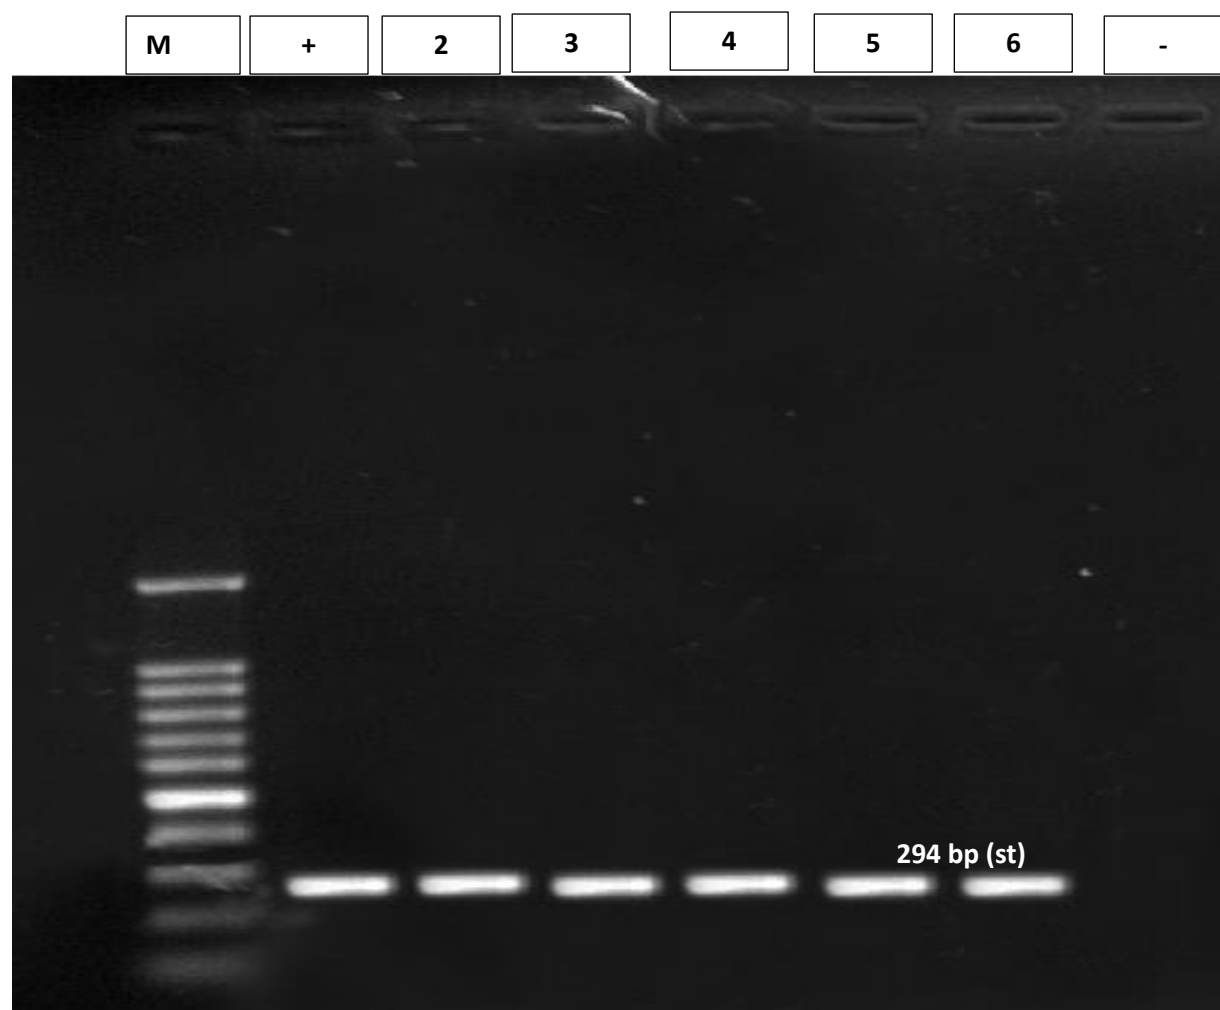

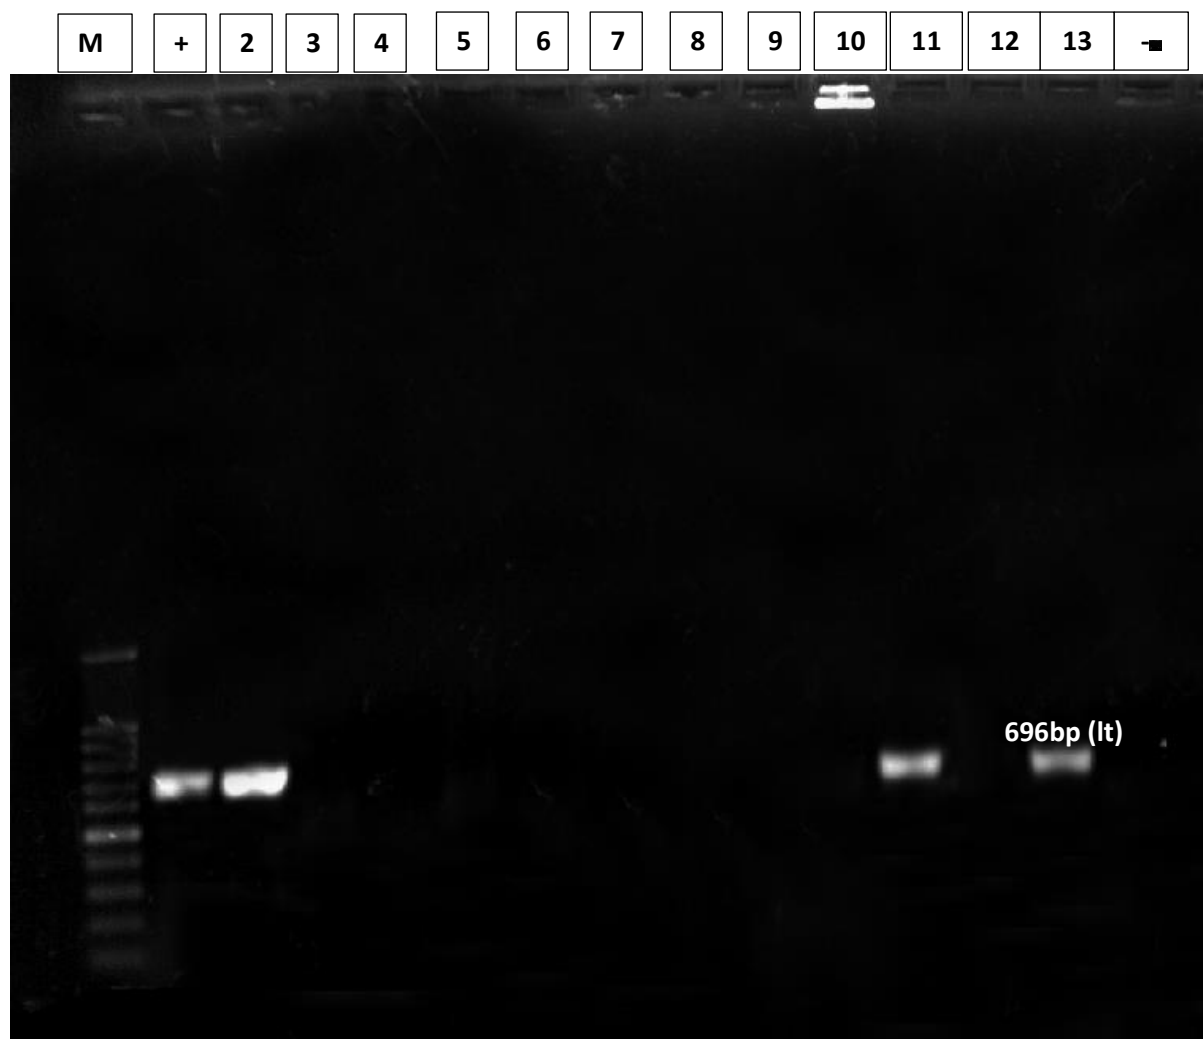

**Figure S1. Representative Agarose gel electrophoresis raw images of PCR amplified products. M: marker size (100bp), Lane 1(+): Positive control; Lane 2-13: PCR product of isolates; Lane (-): Negative control**
